# Supplementary material for: Intercalation of Si between MoS2 layers
Source: Beilstein J Nanotechnol. 2017 Sep 19;8:1952–60. doi: 10.3762/bjnano.8.196 (PMC5629401; doi:10.3762/bjnano.8.196)
Supplement: File 1 — Additional experimental data. [file Beilstein_J_Nanotechnol-08-1952-s001.pdf]

# **Supporting Information**

for

## **Intercalation of Si between MoS<sub>2</sub> layers**

Rik van Bremen<sup>‡,1</sup>, Qirong Yao<sup>‡,1</sup>, Soumya Banerjee<sup>2</sup>, Deniz Cakir<sup>2</sup>, Nuri Oncel<sup>2</sup> and Harold J. W. Zandvliet<sup>\*,1</sup>

Address: <sup>1</sup>Physics of Interfaces and Nanomaterials, MESA<sup>+</sup> Institute for Nanotechnology, University of Twente, P.O. Box 217, 7500AE Enschede, Netherlands and <sup>2</sup>Department of Physics and Astrophysics, University of North Dakota, Grand Forks, ND 58202, USA

Email: Harold J. W. Zandvliet\* - [h.j.w.zandvliet@utwente.nl](mailto:h.j.w.zandvliet@utwente.nl)

\* Corresponding author

‡ Equal contributors

## **Additional experimental data**

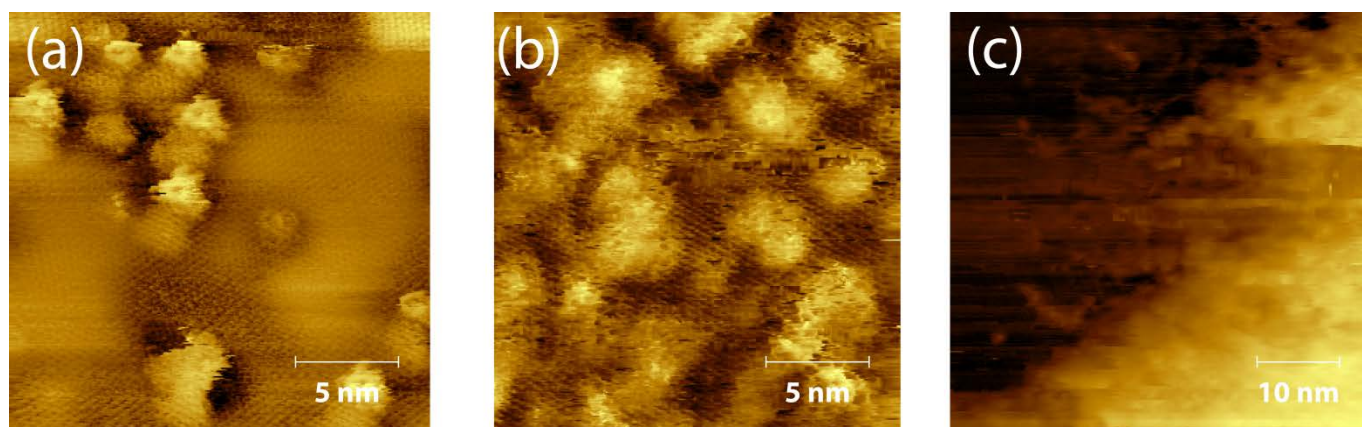

**Figure S1:** Topography of the MoS<sub>2</sub> surface as a function of the amount of deposited silicon. (a) 0.2 monolayers. Here transitions between hills and valleys are visible. The recurring feature is a tip image. (b) 0.8 monolayers. The sample becomes rougher and more difficult to image. (c) 1.4 monolayers. Silicon clusters are visible on top of the MoS<sub>2</sub>.

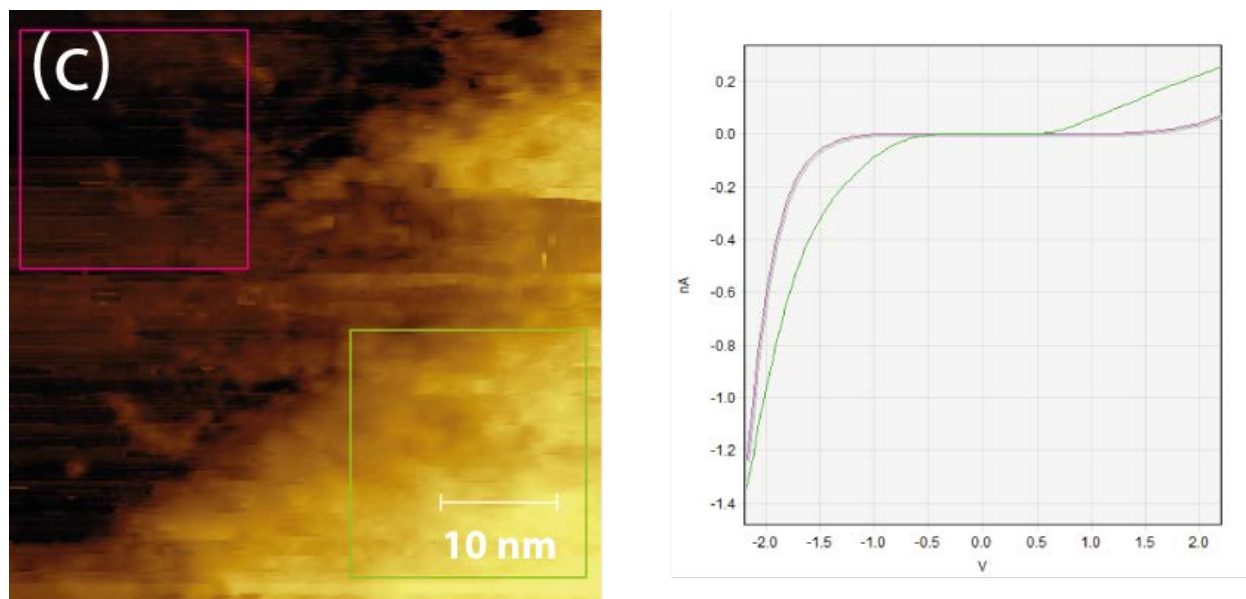

**Figure S2:** (a) silicon clusters on top of MoS<sub>2</sub> after deposition of 1.4 monolayers of silicon. The purple and green boxes indicate the locations where a grid scan is performed. Each grid did consist of 100 curves. (b) The average of the recorded  $I(V)$  curves on top of the cluster (green) is significantly different from the average of the curves recorded on MoS<sub>2</sub> (purple).

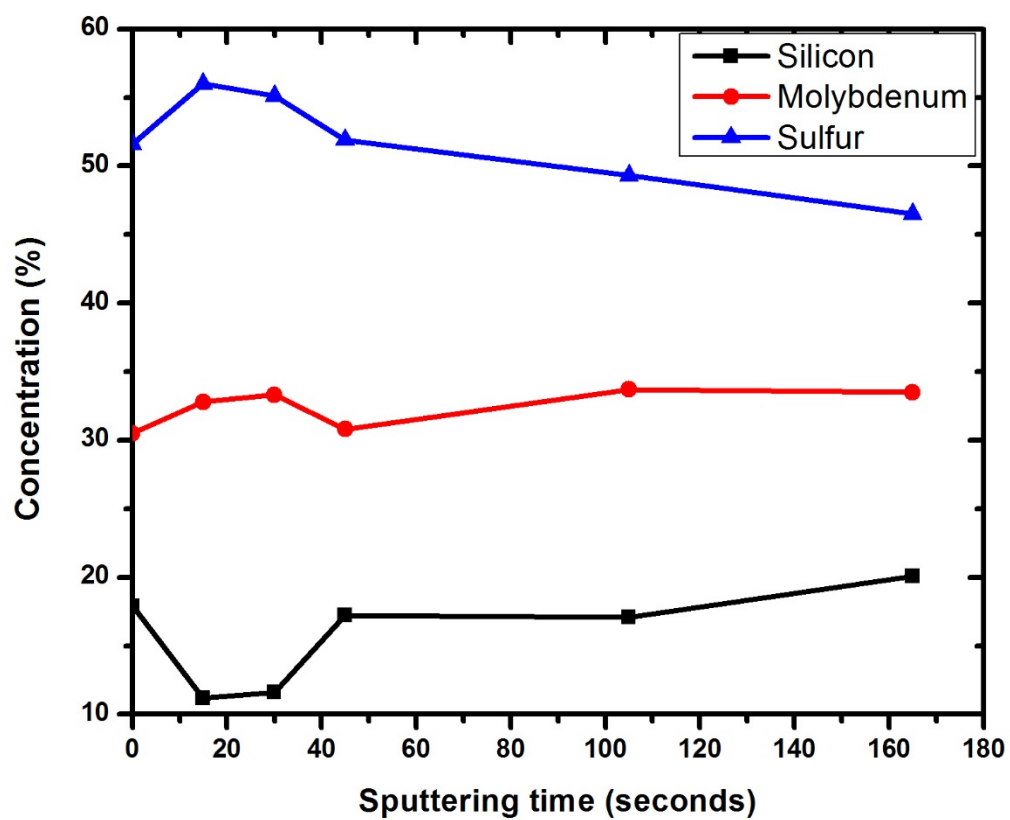

**Figure S3:** Atomic concentration of Si, Mo and S as a function of the sputtering time. The sputter current used is  $0.33\ \mu\text{A}$  with an estimated spot diameter of 2 mm.
